# Supplementary material for: Identification of Bacterial Wilt (Erwinia tracheiphila) Resistances in USDA Melon Collection
Source: MDPI journal article supplement (doi:10.3390/plants10091972), 2021-09-21
Supplement: s1 [file s1]

# Supplementary Material

**Table S1.** List of melon accessions from USDA germplasm collection used in this study \*.

| #  | Accessions | Taxonomic status                           | Geographic origin         |
|----|------------|--------------------------------------------|---------------------------|
| 1  | Ames 13247 | <i>Cucumis sativus</i>                     | Spain, Jaen               |
| 2  | Ames 13257 | <i>Cucumis sativus</i>                     | Spain, Jaen               |
| 3  | PI 206043  | <i>Cucumis sativus</i> var. <i>sativus</i> | Puerto Rico               |
| 4  | PI 229309  | <i>Cucumis sativus</i> var. <i>sativus</i> | Iran, Kerman              |
| 5  | PI 500365  | <i>Cucumis sativus</i> var. <i>sativus</i> | Zambia, Copperbelt        |
| 6  | Ames 2822  | <i>Cucumis melo</i> subsp. <i>melo</i>     | United States, California |
| 7  | Ames 2824  | <i>Cucumis melo</i> subsp. <i>melo</i>     | United States, California |
| 8  | Ames 2826  | <i>Cucumis melo</i> subsp. <i>melo</i>     | United States, California |
| 9  | Ames 2830  | <i>Cucumis melo</i> subsp. <i>melo</i>     | United States, California |
| 10 | Ames 13248 | <i>Cucumis melo</i> subsp. <i>melo</i>     | Spain, Jaen               |
| 11 | Ames 13251 | <i>Cucumis melo</i> subsp. <i>melo</i>     | Spain, Jaen               |
| 12 | Ames 13261 | <i>Cucumis melo</i> subsp. <i>melo</i>     | Spain, Jaen               |
| 13 | Ames 13264 | <i>Cucumis melo</i> subsp. <i>melo</i>     | Spain, Cadiz              |
| 14 | Ames 13268 | <i>Cucumis melo</i> subsp. <i>melo</i>     | Spain, Balearic Islands   |
| 15 | Ames 13270 | <i>Cucumis melo</i> subsp. <i>melo</i>     | Spain, Canary Islands     |
| 16 | Ames 13285 | <i>Cucumis melo</i> subsp. <i>melo</i>     | Spain, Gerona             |
| 17 | Ames 13292 | <i>Cucumis melo</i> subsp. <i>melo</i>     | Spain, Albacete           |
| 18 | Ames 13295 | <i>Cucumis melo</i> subsp. <i>melo</i>     | Spain, Cuenca             |
| 19 | Ames 13299 | <i>Cucumis melo</i> subsp. <i>melo</i>     | Spain, Badajoz            |
| 20 | Ames 13303 | <i>Cucumis melo</i> subsp. <i>melo</i>     | Spain, Murcia             |
| 21 | Ames 13305 | <i>Cucumis melo</i> subsp. <i>melo</i>     | Spain, Murcia             |
| 22 | Ames 13319 | <i>Cucumis melo</i> subsp. <i>melo</i>     | Spain, Murcia             |
| 23 | Ames 13321 | <i>Cucumis melo</i> subsp. <i>melo</i>     | Spain, Alicante           |
| 24 | Ames 13325 | <i>Cucumis melo</i> subsp. <i>melo</i>     | Spain, Alicante           |
| 25 | Ames 13332 | <i>Cucumis melo</i> subsp. <i>melo</i>     | Spain, Alicante           |
| 26 | Ames 13337 | <i>Cucumis melo</i>                        | Spain, Jaen               |
| 27 | Ames 18738 | <i>Cucumis melo</i> subsp. <i>melo</i>     | United States, Colorado   |
| 28 | Ames 19036 | <i>Cucumis melo</i> subsp. <i>melo</i>     | Kazakhstan, Alma-Ata      |
| 29 | Ames 20203 | <i>Cucumis melo</i> subsp. <i>melo</i>     | India                     |
| 30 | Ames 20219 | <i>Cucumis melo</i> subsp. <i>melo</i>     | United States, New York   |
| 31 | NSL 5648   | <i>Cucumis melo</i> subsp. <i>melo</i>     | United States, Colorado   |
| 32 | NSL 8521   | <i>Cucumis melo</i> subsp. <i>melo</i>     | United States, Michigan   |
| 33 | PI 183676  | <i>Cucumis melo</i> subsp. <i>melo</i>     | Turkey, Trabzon           |
| 34 | PI 193495  | <i>Cucumis melo</i> subsp. <i>melo</i>     | Ethiopia, Shewa           |
| 35 | PI 197077  | <i>Cucumis melo</i> subsp. <i>melo</i>     | Spain                     |
| 36 | PI 197891  | <i>Cucumis melo</i> subsp. <i>melo</i>     | United States, Virginia   |
| 37 | PI 199097  | <i>Cucumis melo</i> subsp. <i>melo</i>     | Iran, Tehran              |
| 38 | PI 200814  | <i>Cucumis melo</i> subsp. <i>melo</i>     | Myanmar, Mandalay         |
| 39 | PI 200816  | <i>Cucumis melo</i> subsp. <i>melo</i>     | Myanmar, Mandalay         |
| 40 | PI 204691  | <i>Cucumis melo</i> subsp. <i>melo</i>     | Turkey                    |
| 41 | PI 207659  | <i>Cucumis melo</i> subsp. <i>melo</i>     | Morocco                   |
| 42 | PI 207660  | <i>Cucumis melo</i> subsp. <i>melo</i>     | Morocco                   |
| 43 | PI 207661  | <i>Cucumis melo</i> subsp. <i>melo</i>     | Morocco                   |
| 44 | PI 210541  | <i>Cucumis melo</i> subsp. <i>melo</i>     | India, Meghalaya          |
| 45 | PI 210768  | <i>Cucumis melo</i> subsp. <i>melo</i>     | Turkey, Ankara            |
| 46 | PI 211016  | <i>Cucumis melo</i> subsp. <i>melo</i>     | Afghanistan, Baghlan      |
| 47 | PI 211922  | <i>Cucumis melo</i> subsp. <i>melo</i>     | Iran, Tehran              |
| 48 | PI 211923  | <i>Cucumis melo</i> subsp. <i>melo</i>     | Iran, East Azerbaijan     |

|     |           |                                            |                               |
|-----|-----------|--------------------------------------------|-------------------------------|
| 49  | PI 211936 | <i>Cucumis melo</i> subsp. <i>melo</i>     | Iran, Mazandaran              |
| 50  | PI 211946 | <i>Cucumis melo</i> subsp. <i>melo</i>     | Iran, Tehran                  |
| 51  | PI 211948 | <i>Cucumis melo</i> subsp. <i>melo</i>     | Iran, Tehran                  |
| 52  | PI 211957 | <i>Cucumis melo</i> subsp. <i>melo</i>     | Iran, Kerman                  |
| 53  | PI 212639 | <i>Cucumis melo</i> subsp. <i>melo</i>     | Iran                          |
| 54  | PI 213247 | <i>Cucumis melo</i> subsp. <i>melo</i>     | India, Gujarat                |
| 55  | PI 218070 | <i>Cucumis melo</i> subsp. <i>melo</i>     | Pakistan, Punjab              |
| 56  | PI 218071 | <i>Cucumis melo</i> subsp. <i>melo</i>     | Pakistan, North-West Frontier |
| 57  | PI 222098 | <i>Cucumis melo</i> subsp. <i>melo</i>     | Afghanistan, Kabul            |
| 58  | PI 223636 | <i>Cucumis melo</i> subsp. <i>melo</i>     | Iran, Gilan                   |
| 59  | PI 223770 | <i>Cucumis melo</i> subsp. <i>melo</i>     | Afghanistan, Badakhshan       |
| 60  | PI 224770 | <i>Cucumis melo</i> subsp. <i>melo</i>     | Africa                        |
| 61  | PI 26443  | <i>Cucumis melo</i> subsp. <i>melo</i>     | Israel                        |
| 62  | PI 229750 | <i>Cucumis melo</i> subsp. <i>melo</i>     | Iran, Mazandaran              |
| 63  | PI 230186 | <i>Cucumis melo</i> subsp. <i>melo</i>     | Iran                          |
| 64  | PI 236355 | <i>Cucumis melo</i> subsp. <i>melo</i>     | United Kingdom, England       |
| 65  | PI 244713 | <i>Cucumis melo</i> subsp. <i>melo</i>     | United States, Connecticut    |
| 66  | PI 251778 | <i>Cucumis melo</i> subsp. <i>melo</i>     | Soviet Union, Former          |
| 67  | PI 255948 | <i>Cucumis melo</i> var. <i>cantalupo</i>  | Germany                       |
| 68  | PI 261644 | <i>Cucumis melo</i> subsp. <i>melo</i>     | Netherlands, Gelderland       |
| 69  | PI 266932 | <i>Cucumis melo</i> subsp. <i>melo</i>     | Japan                         |
| 70  | PI 266942 | <i>Cucumis melo</i> var. <i>cantalupo</i>  | United Kingdom, England       |
| 71  | PI 266943 | <i>Cucumis melo</i> var. <i>cantalupo</i>  | France                        |
| 72  | PI 266946 | <i>Cucumis melo</i> var. <i>cantalupo</i>  | France                        |
| 73  | PI 267083 | <i>Cucumis melo</i> subsp. <i>melo</i>     | Turkmenistan                  |
| 74  | PI 271329 | <i>Cucumis melo</i> subsp. <i>melo</i>     | India, Maharashtra            |
| 75  | PI 277280 | <i>Cucumis melo</i> subsp. <i>melo</i>     | India                         |
| 76  | PI 277281 | <i>Cucumis melo</i> subsp. <i>melo</i>     | India                         |
| 77  | PI 292312 | <i>Cucumis melo</i> subsp. <i>melo</i>     | Uzbekistan                    |
| 78  | PI 302446 | <i>Cucumis melo</i> subsp. <i>melo</i>     | India, Delhi                  |
| 79  | PI 319217 | <i>Cucumis melo</i> subsp. <i>melo</i>     | Egypt                         |
| 80  | PI 319218 | <i>Cucumis melo</i> subsp. <i>melo</i>     | Egypt                         |
| 81  | PI 344068 | <i>Cucumis melo</i> subsp. <i>melo</i>     | Turkey, Gaziantep             |
| 82  | PI 344318 | <i>Cucumis melo</i> subsp. <i>melo</i>     | Turkey                        |
| 83  | PI 344345 | <i>Cucumis melo</i> subsp. <i>melo</i>     | Turkey, Tunceli               |
| 84  | PI 344346 | <i>Cucumis melo</i> subsp. <i>melo</i>     | Turkey, Antalya               |
| 85  | PI 344436 | <i>Cucumis melo</i> subsp. <i>melo</i>     | Iran, Fars                    |
| 86  | PI 355715 | <i>Cucumis melo</i> subsp. <i>melo</i>     | Israel                        |
| 87  | PI 357756 | <i>Cucumis melo</i> subsp. <i>melo</i>     | Macedonia                     |
| 88  | PI 357758 | <i>Cucumis melo</i> subsp. <i>melo</i>     | Macedonia                     |
| 89  | PI 357783 | <i>Cucumis melo</i> subsp. <i>melo</i>     | Macedonia                     |
| 90  | PI 370021 | <i>Cucumis melo</i> subsp. <i>melo</i>     | India                         |
| 91  | PI 370441 | <i>Cucumis melo</i> subsp. <i>melo</i>     | Macedonia                     |
| 92  | PI 378059 | <i>Cucumis melo</i> subsp. <i>melo</i>     | Japan                         |
| 93  | PI 378060 | <i>Cucumis melo</i> subsp. <i>melo</i>     | Japan                         |
| 94  | PI 378558 | <i>Cucumis melo</i> subsp. <i>melo</i>     | Afghanistan, Balkh            |
| 95  | PI 391574 | <i>Cucumis melo</i> subsp. <i>melo</i>     | China, Shaanxi                |
| 96  | PI 401600 | <i>Cucumis melo</i> subsp. <i>melo</i>     | Spain                         |
| 97  | PI 401603 | <i>Cucumis melo</i> subsp. <i>melo</i>     | Spain                         |
| 98  | PI 401655 | <i>Cucumis melo</i> subsp. <i>melo</i>     | Spain                         |
| 99  | PI 403994 | <i>Cucumis melo</i> subsp. <i>melo</i>     | Colombia, Tolima              |
| 100 | PI 406737 | <i>Cucumis melo</i> subsp. <i>agrestis</i> | Costa Rica, Puntarenas        |
| 101 | PI 419220 | <i>Cucumis melo</i> subsp. <i>melo</i>     | Poland                        |

|     |             |                                        |                              |
|-----|-------------|----------------------------------------|------------------------------|
| 102 | PI 420146   | <i>Cucumis melo</i> subsp. <i>melo</i> | United States, Arizona       |
| 103 | PI 482396   | <i>Cucumis melo</i> subsp. <i>melo</i> | Zimbabwe                     |
| 104 | PI 482397   | <i>Cucumis melo</i> subsp. <i>melo</i> | Zimbabwe                     |
| 105 | PI 482398   | <i>Cucumis melo</i> subsp. <i>melo</i> | Zimbabwe                     |
| 106 | PI 482400   | <i>Cucumis melo</i> subsp. <i>melo</i> | Zimbabwe                     |
| 107 | PI 502328   | <i>Cucumis melo</i> subsp. <i>melo</i> | Russian Federation, Kalmykia |
| 108 | PI 502329   | <i>Cucumis melo</i> subsp. <i>melo</i> | Ukraine                      |
| 109 | PI 504527   | <i>Cucumis melo</i> subsp. <i>melo</i> | India, Karnataka             |
| 110 | PI 505611   | <i>Cucumis melo</i>                    | Zambia, Southern             |
| 111 | PI 505612   | <i>Cucumis melo</i>                    | Zambia, Southern             |
| 112 | PI 601164   | <i>Cucumis melo</i> subsp. <i>melo</i> | United States, Alabama       |
| 113 | PI 614159   | <i>Cucumis melo</i> subsp. <i>melo</i> | India, Rajasthan             |
| 114 | PI 614161   | <i>Cucumis melo</i> subsp. <i>melo</i> | India, Rajasthan             |
| 115 | PI 618819   | <i>Cucumis melo</i> subsp. <i>melo</i> | China                        |
| 116 | PI 505598   | <i>Cucumis metuliferus</i>             | Zambia, North-Western        |
| 117 | Ames 13302  | <i>Cucumis melo</i> subsp. <i>melo</i> | Spain, Murcia                |
| 118 | Ames 13304  | <i>Cucumis melo</i> subsp. <i>melo</i> | Spain, Murcia                |
| 119 | Ames 13317  | <i>Cucumis melo</i> subsp. <i>melo</i> | Spain, Murcia                |
| 120 | Ames 13318  | <i>Cucumis melo</i> subsp. <i>melo</i> | Spain, Murcia                |
| 121 | PI 512442   | <i>Cucumis melo</i> subsp. <i>melo</i> | Spain, Malaga                |
| 122 | Ames 512543 | <i>Cucumis melo</i> subsp. <i>melo</i> | Spain, Alicante              |
| 123 | PI 618838   | <i>Cucumis melo</i> subsp. <i>melo</i> | China, Xinjiang              |

---

\* Additional information of the accessions is available at <https://www.ars-grin.gov/>. accessed 17 Sept, 2021
